# Supplementary material for: NADPH Oxidase 4 Signaling in a Ventilator-Induced Lung Injury Mouse Model
Source: Research Square preprint supplement (doi:10.21203/rs.3.rs-104053/v1), 2020-11-12

**Supplementary data**

**Fig S1.** **Time table for NOX4 inhibitor treatment in the high tidal volume group**

In the VILI model, mice were tracheostomized, and the ventilator was maintained for 5 h in the supine position with 24 mL/kg volume, 0 cmH2O PEEP, 100/min respiration rate, and 0.21 inspired oxygen fraction.

**
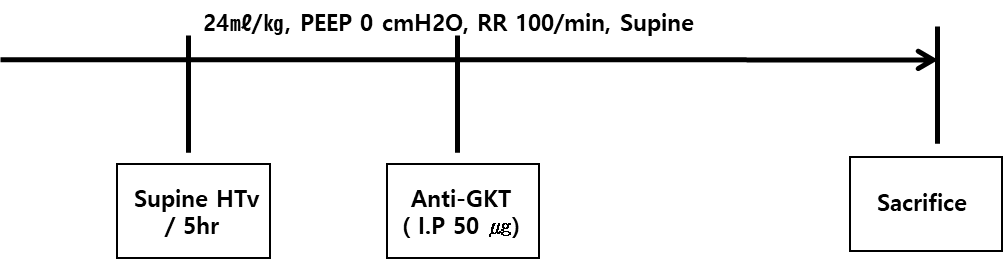
**

**Fig S2. Potential mechanisms by which NOX4 inhibition attenuates VILI.** Our study suggests that NOX4 inhibition decreases VILI through EphA2, PI3K-r, and Nrf2 signaling.

VILI, ventilator-induced lung injury


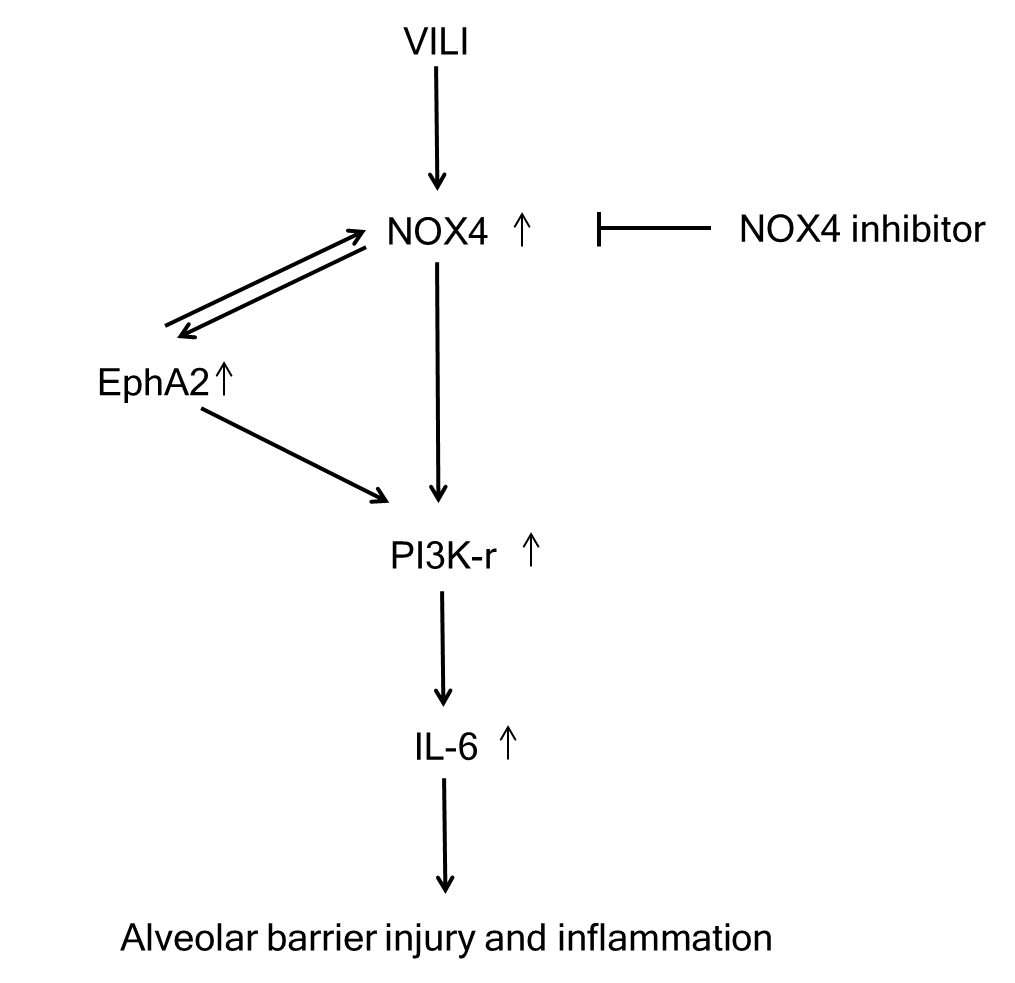

Supplement: Supplementary file 1 [file b2b8a1ac0452713d5ce73b9a.docx]
